# Supplementary material for: Phenotype reversion in fetal human liver epithelial cells identifies the role of an intermediate meso-endodermal stage before hepatic maturation
Source: Oxford University Press journal article supplement (doi:10.1242/jcs.019315), 2008-03-05
Supplement: jcs019315-tables1.pdf [file jcs019315-tables1.pdf]

## Gene expression profiles in sorted fetal liver cells

| Marker                 | Ep-CAM-positive fraction | Ep-CAM-negative fraction |
|------------------------|--------------------------|--------------------------|
| <b>Hepatic markers</b> |                          |                          |
| Albumin                | 64±9%*                   | 5±2%                     |
| AFP                    | 38±5%*                   | 3±2%                     |
| Glycogen               | 57±8%*                   | 8±4%                     |
| <b>Biliary markers</b> |                          |                          |
| CK-19                  | 72±9%*                   | 2±1%                     |
| GGT                    | 51±6%*                   | 6±3%                     |
| DPPIV                  | 52±5%*                   | 0.2±0.3%                 |
| Alkaline phosphatase   | 8±4%                     | ND                       |

P<0.001 vs. Ep-CAM-negative fraction, ANOVA; ND = not done
