# Supplementary material for: Phenotype reversion in fetal human liver epithelial cells identifies the role of an intermediate meso-endodermal stage before hepatic maturation
Source: Oxford University Press journal article supplement (doi:10.1242/jcs.019315), 2008-03-05
Supplement: jcs019315-tables2.pdf [file jcs019315-tables2.pdf]

**Table S2. Immunostaining protocols**

| <b>Antigen</b>  | <b>Fixation</b> | <b>Blocking</b>                            | <b>Primary Antibody</b>                                    | <b>Dilution</b> | <b>Secondary Antibody</b>                                                   | <b>Dilution</b> | <b>Color development</b> | <b>Counter-stain</b> |
|-----------------|-----------------|--------------------------------------------|------------------------------------------------------------|-----------------|-----------------------------------------------------------------------------|-----------------|--------------------------|----------------------|
| <b>AFP</b>      | 4% PAF, RT      | 3% Goat serum                              | MFCD00162111 (#A8452, Sigma)                               | 1:500           | Peroxidase-conjugated anti-mouse IgG (#A3682, Sigma)                        | 1:200           | DAB                      | -                    |
| <b>Alb</b>      | 4% PAF, RT      | 3% Goat serum                              | HSA-11 clone (#A6684, Sigma)                               | 1:1000          | FITC-conjugated IgG (#F9137, Sigma)                                         | 1:300           | -                        | DAPI                 |
| <b>Alb</b>      | 4% PAF, RT      | 3% Goat serum                              | IgG fraction antiserum (#A0433, Sigma)                     | 1:1000          | FITC-conjugated IgG (#F0382, Sigma)                                         | 1:300           | -                        | -                    |
| <b>CK-19</b>    | 4% PAF, RT      | 3% Goat serum                              | RPN 1165 (Amersham Pharmacia Biotech Inc., Piscataway, NJ) | 1:100           | Peroxidase-conjugated IgG (#A3682, Sigma)                                   | 1:200           | DAB                      | -                    |
| <b>CK-19</b>    | 4% PAF, RT      | 5% Donkey serum                            | RPN 1165 (Amersham Pharmacia Biotech)                      | 1:100           | Rhodamine-conjugated IgG (#715-295-150, Jackson ImmunoRes., West Grove, PA) | 1:500           | -                        | DAPI                 |
| <b>Ep-CAM</b>   | 4% PAF, RT      | 5% Donkey serum                            | MCA850H (Serotec Ltd., Raleigh, NC)                        | None            | Rhodamine-conjugated anti mouse IgG (#715-295-150, Jackson Immuno Research) | 1:500           | -                        | DAPI                 |
| <b>GFP</b>      | 4% PAF, RT      | 5% goat serum<br>1% BSA, 0.1% Triton X-100 | Rabbit anti-GFP (#A-6455, Molecular Probes, Eugene, OR)    | 1:300           | FITC-conjugated anti-rabbit IgG (#F0382, Sigma)                             | 1:40            | -                        | DAPI                 |
| <b>Ki-67</b>    | Ethanol, 4°C    | 3% Goat serum                              | Mouse monoclonal (#550609, Pharmingen Inc., San Diego)     | 1:25            | Peroxidase-conjugated anti-mouse IgG (#A3682, Sigma)                        | 1:200           | DAB                      | -                    |
| <b>α-SMA</b>    | 4% PAF, RT      |                                            | Anti-α smooth muscle-Cy3™ (#C6198, Sigma)                  | 1:800           | -                                                                           | -               | -                        | DAPI                 |
| <b>Vimentin</b> | 4% PAF, RT      | 5% Donkey serum                            | V212210 (United States Biological, Swampscott, MA)         | 1:100           | Rhodamine-conjugated anti mouse IgG (#715-295-150, Jackson Immuno Research) | 1:500           | -                        | DAPI                 |
| <b>Common</b>   | 10 min          | 1 h, RT                                    | 2 h incubation, RT                                         | -               | 1 h incubation, RT                                                          | -               | -                        | -                    |

RT= room temperature; PFA= paraformaldehyde; DAPI = 4',6-Diamidino-2-phenylindole; DAB = diaminobenzidine
