# Supplementary material for: Phenotype reversion in fetal human liver epithelial cells identifies the role of an intermediate meso-endodermal stage before hepatic maturation
Source: Oxford University Press journal article supplement (doi:10.1242/jcs.019315), 2008-03-05
Supplement: jcs019315-tables3.pdf [file jcs019315-tables3.pdf]

**Table S3. PCR Primers**

| Gene                    | Primer pairs (5'-3'; Forward and Reverse)             | Tm (°C) | Product (bp) | Reference                                       |
|-------------------------|-------------------------------------------------------|---------|--------------|-------------------------------------------------|
| <b>ABCG-2</b>           | GGGTTCTCTTCTTCCTGACGACC<br>TGGTTGTGAGATTGACCAACAGACC  | 65      | 398          | CW Scharenberg et al. Blood 2002;99: 507        |
| <b>Alb</b>              | TGCTTGAATGTGCTGATGACAGGG<br>AAGGCAAGTCAGCAGGCATCTCATC | 60      | 160          | R Schwartz et al. J Clin Invest 2002; 109: 1291 |
| <b>AFP</b>              | TGCAGCCAAAGTGAAGAGGGAAGA<br>CATAGCGAGCAGCCCAAAGAAGAA  | 60      | 160          | R Schwartz et al. J Clin Invest 2002; 109: 1291 |
| <b>β-Actin</b>          | AGAGCTATGAGCTGCCTGAC<br>CTGATCCACATCTGCTGGAA          | 65      | 361          | Y. Heremans et al. J Cell Biol 2002;159: 303    |
| <b>β2-microglobulin</b> | AGCAAGGACTGGTCTTT<br>CTCGATCCCACTTAACTATCT            | 54      | 124          | Current authors (MI)                            |
| <b>CK-19</b>            | ATGGCCGAGCAGAACCGGAA<br>CCATGAGCCGCTGGTACTCC          | 60      | 308          | R Schwartz et al. J Clin Invest 2002; 109: 1291 |
| <b>E-Cadherin</b>       | TTGGTCTACGCTGGG<br>AGTTGGGAAATGTGAGCA                 | 60      | 139          | Current authors (MI)                            |
| <b>EGF receptor</b>     | ATTCCGAGACGAAGCC<br>CACGAGCCGTGATCTG                  | 60      | 162          | Current authors (MI)                            |
| <b>Frizzled-1</b>       | GAACCTTCCTCCAAC TTCATGGC<br>CATTCCATTTTACAGACCGG      | 60      | 398          | YW Qiang et al. Oncogene 2003;22:1536           |
| <b>Frizzled -2</b>      | GGTGAGCCAGCACTGCAAGAG<br>CCTAAAAGTGAAATGGTTTCGATCG    | 60      | 310          | YW Qiang et al. Oncogene 2003;22:1536           |
| <b>Frizzled -3</b>      | GCTGTACTCACAGTTAACATG<br>GCTAAAATACCCTTGCTGATTT       | 45      | 450          | YW Qiang et al. Oncogene 2003;22:1536           |
| <b>Frizzled -4</b>      | TGCCTTTTCAGGGCAAAGTG<br>ACAGGAAGAGATTTATGGAATG        | 55      | 378          | YW Qiang et al. Oncogene 2003;22:1536           |
| <b>Frizzled -5</b>      | TACCCAGCCTGTCGCTAAAC<br>AAAACCGTCCAAAGATAAACTGC       | 55      | 247          | YW Qiang et al. Oncogene 2003;22:1536           |
| <b>Frizzled -6</b>      | ACATCTCTGCTTGTTTAC<br>GATCTGTGAAATTCCTAA              | 45      | 732          | YW Qiang et al. Oncogene 2003;22:1536           |
| <b>Frizzled -7</b>      | GTTTGGATGAAAAGATTTTCAGGC<br>GACCACTGCTTGACAAGCACAC    | 60      | 294          | YW Qiang et al. Oncogene 2003;22:1536           |
| <b>Frizzled -8</b>      | ACAGTGTGATTGCTATTAGCATG<br>GTGAAATCTGTGTATCTGACTGC    | 55      | 268          | YW Qiang et al. Oncogene 2003;22:1536           |
| <b>Frizzled -9</b>      | CCCTAGAGACAGCTGACTAGCAG<br>CGGGGGTTTATTCCAGTCACAGC    | 60      | 270          | YW Qiang et al. Oncogene 2003;22:1536           |

|                                         |                                                          |    |     |                                                         |
|-----------------------------------------|----------------------------------------------------------|----|-----|---------------------------------------------------------|
| <b>Frizzled -10</b>                     | ACACGTCCAACGCCAGCATG<br>ACGAGTCATGTTGTAGCCGATG           | 60 | 160 | YW Qiang et al. Oncogene 2003;22:1536                   |
| <b>HNF-1<math>\alpha</math></b>         | GTGTCTACAACGGTTTGCC<br>TGTAGACACTGCTACTAAGG              | 52 | 251 | I Lemm I. et al. Mol Carcinogenesis 1999; 24:305        |
| <b>HNF-1<math>\beta</math></b>          | GAAACAATGAGATCACTTCCTCC<br>CTTTGTGCAATTGCCATGACTCC       | 56 | 374 | I Lemm et al. Mol Carcinogenesis 1999; 24:305           |
| <b>HNF-3<math>\alpha</math></b>         | CAACATGTTTCGAGAACGGCT<br>CCACTGTGGTCCAGAGTCTG            | 56 | 263 | RK Giri (unpublished)                                   |
| <b>HNF-3<math>\beta</math></b>          | CACCCTACGCCTTAACCAC<br>GGTAGTAGGAGGTATCTGCGG             | 52 | 235 | Current authors (MI)                                    |
| <b>HNF-4</b>                            | CTGCTCGGAGCCACAAAGAGATCCATG<br>ATCATCTGCCACGTGATGCTCTGCA | 58 | 370 | L Suaud et al. Biochem Biophys Res Commun 1997;235: 820 |
| <b>HGF</b>                              | ACCACACGAACACAGC<br>AGACTTCGTAGCGTACC                    | 60 | 134 | Current authors (MI)                                    |
| <b>c-Met</b>                            | ACAACCCGAATACTGCC<br>AGGATACGGAGCGACA                    | 54 | 190 | Current authors (MI)                                    |
| <b>Nanog</b>                            | AGAACTCTCCAACATCCTG<br>GGGTAGGTAGGTGCTG                  | 54 | 147 | Current authors (MI)                                    |
| <b>Notch-1</b>                          | GCGGCCGCCTTTGTGGTTCTGTTC<br>GCCGGCGCGTCTCCTCTTCC         | 65 | 500 | J. Walsh et al. APMIS, 2003; 111: 197-210               |
| <b>Notch-2</b>                          | TCGTGCAAGAGCCAGTTACCC<br>AATGTCATGGCCGCTTCAGAG           | 65 | 530 | J. Walsh et al. APMIS, 2003; 111: 197-210               |
| <b>Oct-4</b>                            | AGTGAGAGGCAACCTG<br>CGTTGTGCAAGTCGC                      | 53 | 165 | Current authors (MI)                                    |
| <b><math>\alpha</math>-SMA</b>          | AGTACCCGATAGAACATGG<br>TTTTCTCCCGTTGGC                   | 60 | 153 | Current authors (MI)                                    |
| <b>TGF-<math>\beta</math>1</b>          | TGATGTCACCGGAGTTG<br>GAACCCGTTGATGTCCA                   | 58 | 124 | Current authors (MI)                                    |
| <b>TGF-<math>\beta</math>2</b>          | CAACAGACCAACCGGC<br>GTACCCTTTGGGTTTCGT                   | 58 | 144 | Current authors (MI)                                    |
| <b>TGF-<math>\beta</math>1 Receptor</b> | CGTGCTGACATCTATGCAAT<br>AGCTGCTCCATTGGCATAAC             | 54 | 251 | U Wulbrand et al. Eur J Clin Invest 1998; 28:1038       |
| <b>TGF-<math>\beta</math>2 Receptor</b> | TGCGTCTGGACCCTAC<br>ACTGCATTACAGCGAGAT                   | 58 | 187 | RK Giri (unpublished)                                   |
| <b>Vimentin</b>                         | CACCTACAGCCTCTACG<br>AGCGGTCATTACAGCTC                   | 60 | 170 | Current authors (MI)                                    |
